# Supplementary figures and images for: BRAFE600-associated senescence-like cell cycle arrest of human naevi
Source: Springer Nature journal article supplement (doi:10.1038/nature03890), 2005-08-01

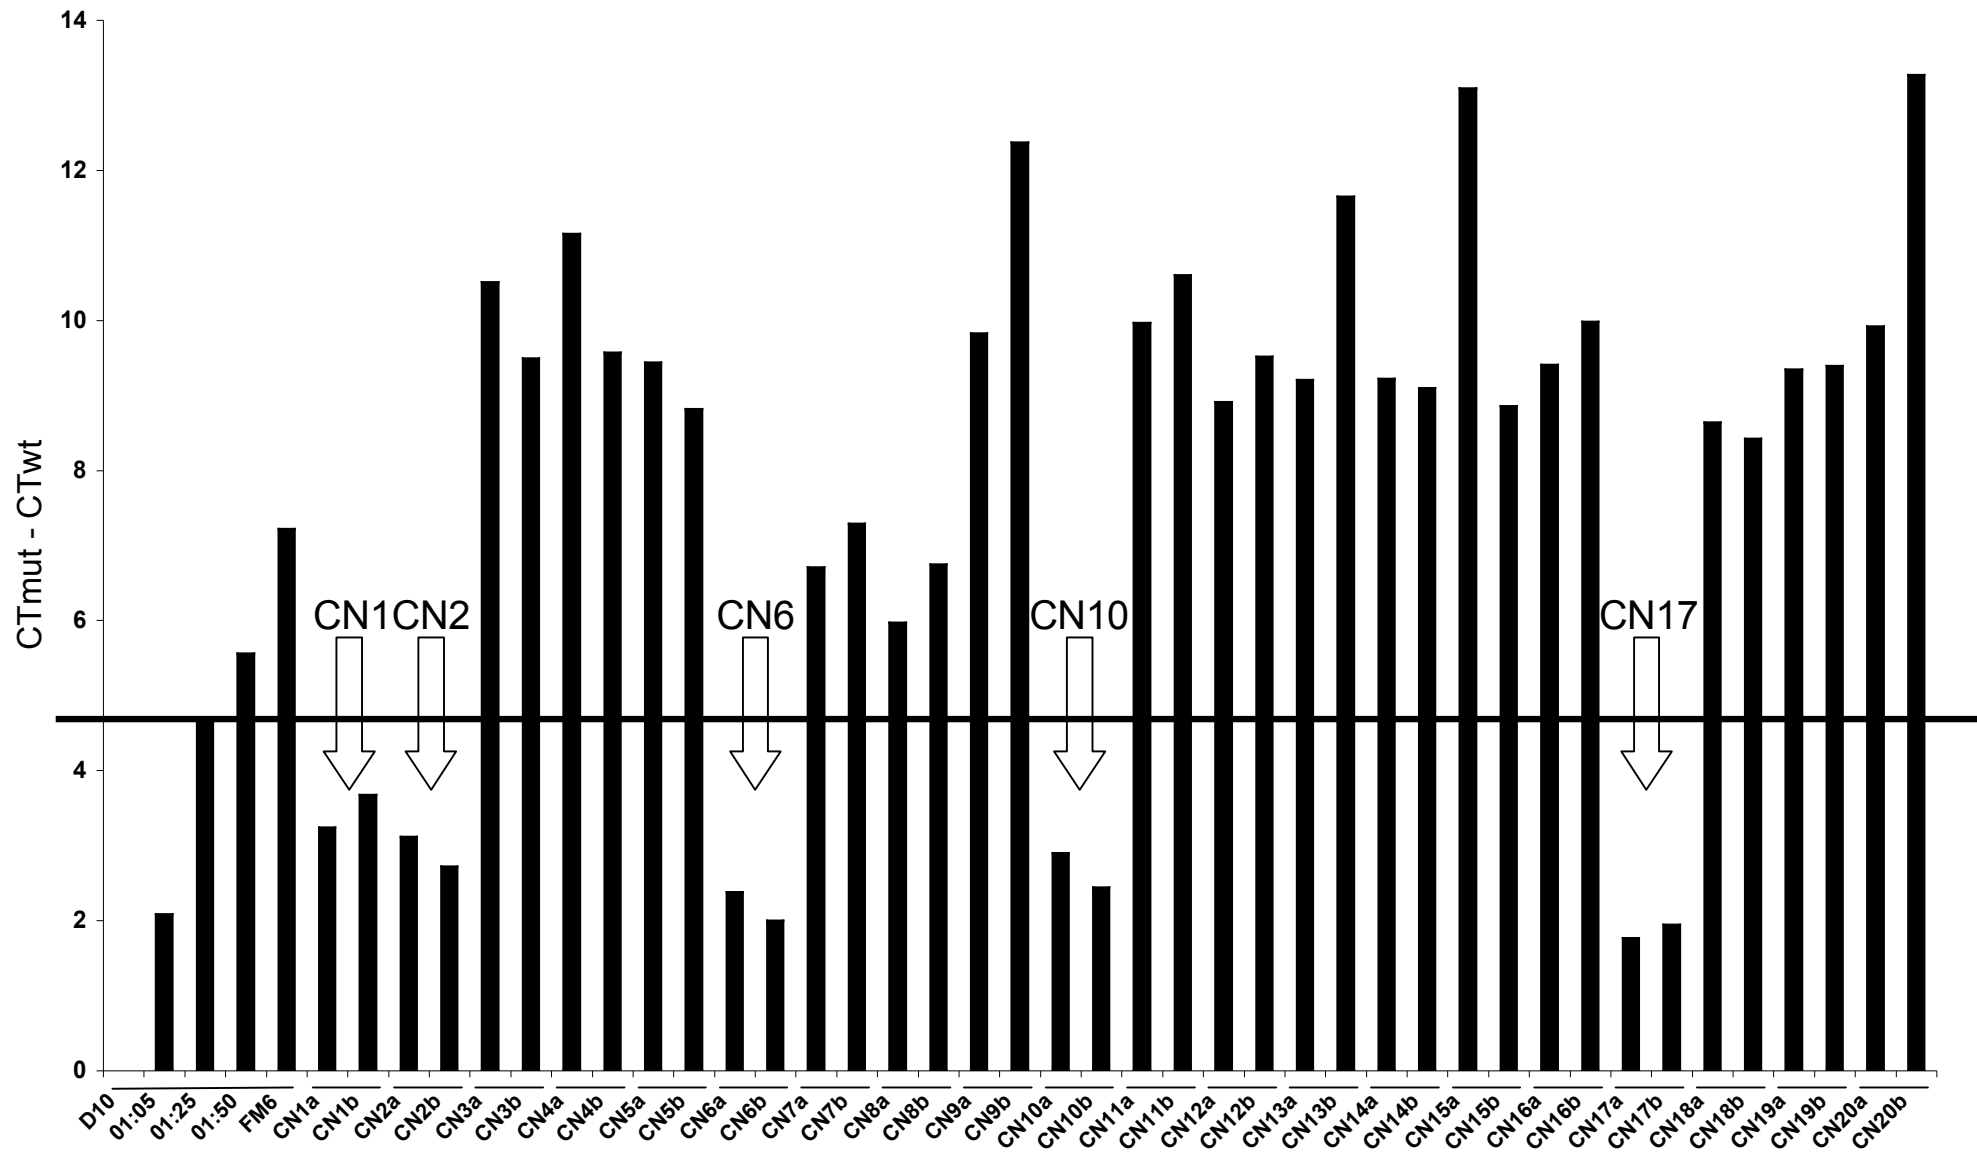

Suppl. Figure 5

Supplement: nature03890-s6.pdf [file nature03890-s6.pdf]
